# Supplementary material for: Improving food security for Labrador Inuit in Nunatsiavut, Labrador: A matter of health equity
Source: Research Square preprint supplement (doi:10.21203/rs.3.rs-1056651/v1), 2021-11-11
Supplement: Supplementary file 1 [file 3442b8c1276fa170c9fd9bab.docx]

**Appendix A**

**Key informant interview questions**

**Date: ______________________ Time:___________________________**

**Section 1: Overview of role**

1.a. What is the name of your department/organization?

1.b. What is the mandate of your department/organization?

1.c What is your title?

1.d. Describe your main role in (insert name of policy)

1.e. Would you consider your role in this policy to be:

Setting the policy agenda __________

Develops policy _______________

Implements policy _____________

Other: Please state _____________

**Section 2: Overview of the policy (insert name of policy)**

2.1: You were provided with a copy of the policy description with these questions. Has the policy description changed since it was published? If so, can you describe how it has changed?

2.2: From your department/organization’s perspective, does this policy pertain to food security in Nunatsiavut?

2.2.1: Do you have a particular lens that influences your perspective on food security and this policy?

*2.3: Policy Development*

2.3.a. From your department/organization’s perspective, was the Labrador Inuit context (i.e. relevant evidence or approaches) considered when developing the policy?

2.3.b. From your department/organization’s perspective, were there any other considerations when developing this policy?

2.3.c. Can you describe who your department/organization consulted with when developing this policy?

2.3.d. Can you describe the consultation process?

2.3.e. How was gender considered when developing this policy?

*2.4 Policy Implementation*

2.4.a. Who does your department/organization work with to implement this policy?

2.4.b. What activities pertain to food security associated with policy implementation?

2.4.c. Are there any opportunities and/or challenges encountered when implementing this policy?

*2.5 Policy Evaluation*

2.5.a. Can you describe the policy evaluation? Was there anything specific to food security?

2.5.b. If no, is there an intent to evaluate the policy in the future? Will there be a focus on food security?

2.5.c. How could this policy be further improved to address food security in Nunatsiavut?

*2.6 Other considerations*

2.6.a. From your department/organization’s perspective, who is ultimately responsible for food security in Nunatsiavut?

2.6.b. From your department’s/organization’s perspective, what are the policy gaps for food security in Nunatsiavut?

2.6.c. From your department’s/organization’s perspective, what other policies are required for food security in Nunatsiavut?

2.6.d. Has the recent COVID-19 experience raised the priority of food security within your department/organization?

2.6.e. Has the COVID-19 situation highlighted any vulnerabilities in the food system? If yes, can you please describe?

2.6.f. Were any additional actions taken to address food security during COVID-19?

- If yes, can you please describe?
  - Would you like to see some of these actions continued on a longer-term basis?

**Section 3: Mapping policy networks**

3.a. What other governments/departments/organizations do you work with to develop or implement food security policy?

3.b. Using the scale below, with 1 being the weakest and 5 being the strongest, can you estimate the strength of your relationship?

1 2 3 4 5

3.c. Can you please tell me how you decided on this rating?

**Section 4: Final comments**

4.a. From your perspective is there anyone else I should interview?

- If yes, please state who and why?

4.b. Is there anything else you would like to add?

Thank you for your participation.
